# Supplementary material for: The effect of the electronic transmission of prescriptions on dispensing errors and prescription enhancements made in English community pharmacies: a naturalistic stepped wedge study
Source: PubMed Central journal article supplement — BMJ Qual Saf. 2014 Apr 17;23(8):629–38. doi: 10.1136/bmjqs-2013-002776 (PMC4112418; doi:10.1136/bmjqs-2013-002776), 2014-04-17

**Appendix 2:** Cumulative numbers of EPSR2 (dotted line) and non-EPSR2 (solid line) prescription items checked during the study period

EPSR2: Electronic Prescription Service Release 2.

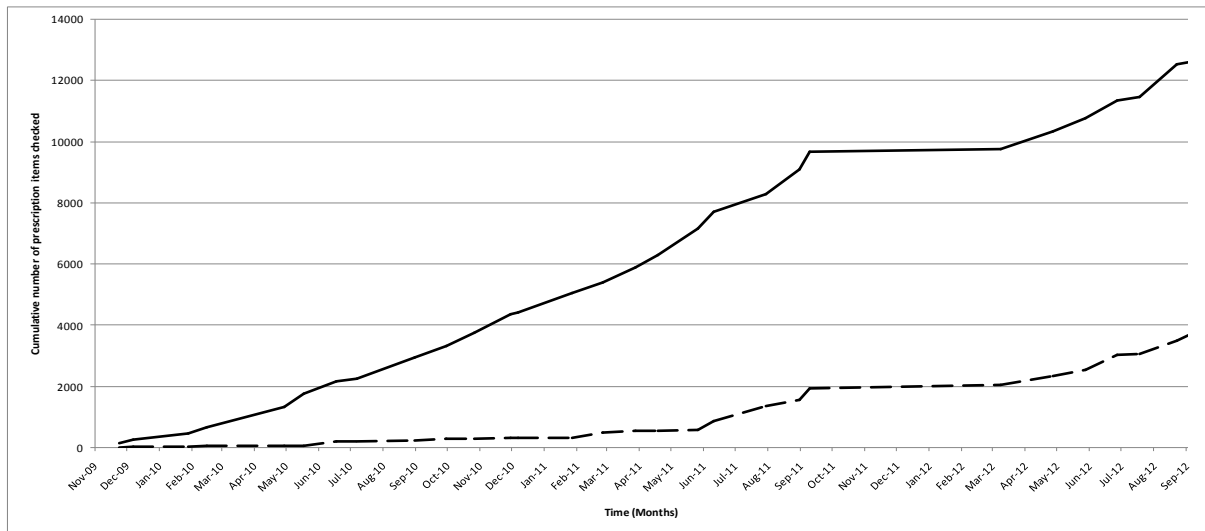

Supplement: bmjqs-2013-002776-s2.pdf [file bmjqs-2013-002776-s2.pdf]
